# Supplementary material for: Contribution of the Fenton reaction to the degradation of carbon nanotubes by enzymes
Source: Frontiers journal article supplement (doi:10.3389/fenvs.2023.1184257), 2023-06-13
Supplement: Data_Sheet_1.DOCX [file Data_Sheet_1.DOCX]

Supplementary Material

**
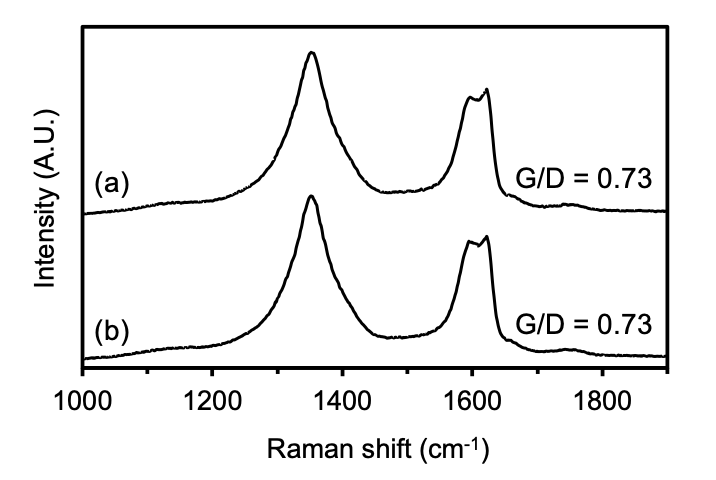
Supplementary Figures**

**Figure S1.** Raman spectra (excitation wavelength of 532 nm) of O-SWCNTs before (a) and after (b) sonication for 10 min in the presence of 100 mM H2O2. The A750 of the O-SWCNT suspension was 0.964 both before and after sonication.

**Figure S2.** Time course of ·OH concentrations in samples incubated with and without mt2DyP. Error bars indicate standard error (n = 3).

**Figure S3.** Time course of O-SWCNT concentrations in suspensions incubated under the same conditions as in the presence of mt2DyP or mt2P450, replacing the enzyme with FeCl3 at the same stoichiometric concentration as that of the enzyme. Error bars indicate standard error (n = 3).

**Figure S4.** SDS-PAGE **(A)** and UV-vis spectrum **(B)** of purified mt2P450, and the pH dependence of the enzyme activity in the ABTS substrate **(C)**. Error bars indicate standard error (n = 3).

**Figure S5.** Analysis of O-SWCNT degradation products formed by incubation with mt2P450. HPLC chromatograms of samples after 0 d **(A)** and 7 d **(B)** of incubation. LC-MS spectrum of samples after 0 d **(C)** and 7 d **(D)** of incubation. AU, arbitrary units.

**Figure S6.** Time course of ·OH concentrations in samples incubated with and without mt2P450. Error bars indicate standard error (n = 3).

**Figure S7.** Time course of O-SWCNT concentrations in suspensions incubated under the same conditions as in the presence of HRP, replacing the enzyme with FeCl3 at the same stoichiometric concentration as that of the enzyme. Error bars indicate standard error (n = 3).

**Figure S8.** Time course of the enzyme activity of HRP during incubation with O-SWCNTs in the presence and absence of H2O2. Error bars indicate standard error (n = 3).

**Figure S9.** Time course of A413 of oxidized ABTS at different HRP concentrations for 30 s after the start of the reaction under the assay conditions used in this study. 5 μL of a HRP solution of various concentrations (0, 0.6, 1.2, 2.4, and 4 μM) was added to 995 μL of the reaction mixture. The final concentrations of ABTS, H2O2, and HRP in PBS (pH 6.0) were 0.45 mM, 1 mM, and 3, 6, 12, and 20 nM.

**Figure S10.** Time course of A570 of oxidized Amplex Red at different HRP concentrations for 30 s after the start of the reaction under the assay conditions used in the previous studies. 500 μL of a HRP solution of various concentrations (0, 0.6, 1.2, 2.4, and 4 μM) was added to the equal volume of the reaction mixture. The final concentrations of Amplex Red, H2O2, and HRP in PBS (pH 6.0) were 20 μM, 24 μM, and 0, 0.3, 0.6, 1.2, and 2 μM.

**Figure S11.** Monitoring the absorbance at 570 nm of Amplex Red oxidized by HRP for 3 min after the start of the reaction under the assay conditions used in this study with slight modification. The final concentrations of Amplex Red, H2O2, and HRP in PBS (pH 6.0) were 20 μM, 1 mM, 0.6, 1.2, 2.4, and 4 nM.

**Figure S12.** **(A)** The UV-Vis spectrum of oxidized Amplex Red at different HRP concentrations under assay conditions used in this study with slight modification. 1 mL of the HRP solution of various concentrations (0, 0.6, 1.2, 2.4, and 4 mM) was added to 999 mL of the reaction mixture. The final concentrations of Amplex Red, H2O2, and HRP in PBS (pH 6.0) were 20 μM, 1 mM, 0.6, 1.2, 2.4, and 4 nM. **(B)** Relative activity of Amplex Red oxidation at different HRP concentrations, determined from A570 of the UV-Vis spectrum in (A). The activity at the highest HRP concentration is shown as 100%. Error bars indicate standard error (n = 3).
